# Supplementary material for: The structure of monoclinic Na2B10H10: a combined diffraction, spectroscopy, and theoretical approach
Source: Royal Society of Chemistry journal article supplement (doi:10.1039/c5ce00369e), 2015-01-01
Supplement: c5ce00369e5.pdf [file c5ce00369e5.pdf]

## Electronic Supplementary Information for:

### The Structure of Monoclinic Na<sub>2</sub>B<sub>10</sub>H<sub>10</sub>: A Combined Diffraction, Spectroscopy, and Theoretical Approach

Hui Wu<sup>\*a,b</sup> Wan Si Tang,<sup>a,b</sup> Wei Zhou,<sup>a,b</sup> Vitalie Stavila,<sup>c</sup> John J. Rush,<sup>a,b</sup> and Terrence J. Udovic<sup>\*a</sup>

<sup>a</sup>NIST Center for Neutron Research, National Institute of Standards and Technology, Gaithersburg, MD 20899-6102

<sup>b</sup>Department of Materials Science and Engineering, University of Maryland, College Park, MD 20742-2115

<sup>c</sup>Energy Nanomaterials, Sandia National Laboratories, Livermore, CA 94551

### How to view phonon animations using the V\_Sim software\*

The **Na2B10H10\_phonons.xyz** and **Na2B10D10\_phonons.xyz** files contain the information needed to view the animated (gamma-point) phonon normal modes from the DFT-optimized 0 K Na<sub>2</sub><sup>11</sup>B<sub>10</sub>H<sub>10</sub> and Na<sub>2</sub><sup>11</sup>B<sub>10</sub>D<sub>10</sub> structures, respectively, following the steps below:

- Get the V\_Sim software (It is free, and there is no need to install).
- Go to the following webpage and download the Win32 binaries:  
[http://www-drfmc.cea.fr/L\\_Sim/V\\_Sim/download.html](http://www-drfmc.cea.fr/L_Sim/V_Sim/download.html)
- Unzip the zip file to wherever you want to put the software.
- Click "**~V\_Sim\bin\V\_sim.exe**" to start the V\_Sim program, then open the **Na2B10H10\_phonons.xyz** or **Na2B10D10\_phonons.xyz** file to view the phonon animations.
- To build bonds in the structure, check the box on the left side of the "Pairs" button, and click the "Pairs" button.
- Highlight a pair and click the "Auto set" button to allow bonding.
- Adjust the "Link parameters," if desired.
- Adjust the element color, radius, etc. on the "Elements" tab, if desired.
- Go to the "Phonons" tab, highlight a phonon mode, and click the "Play" button to view a phonon animation.

\* N.B., the use of this software does not imply its recommendation or endorsement by NIST.

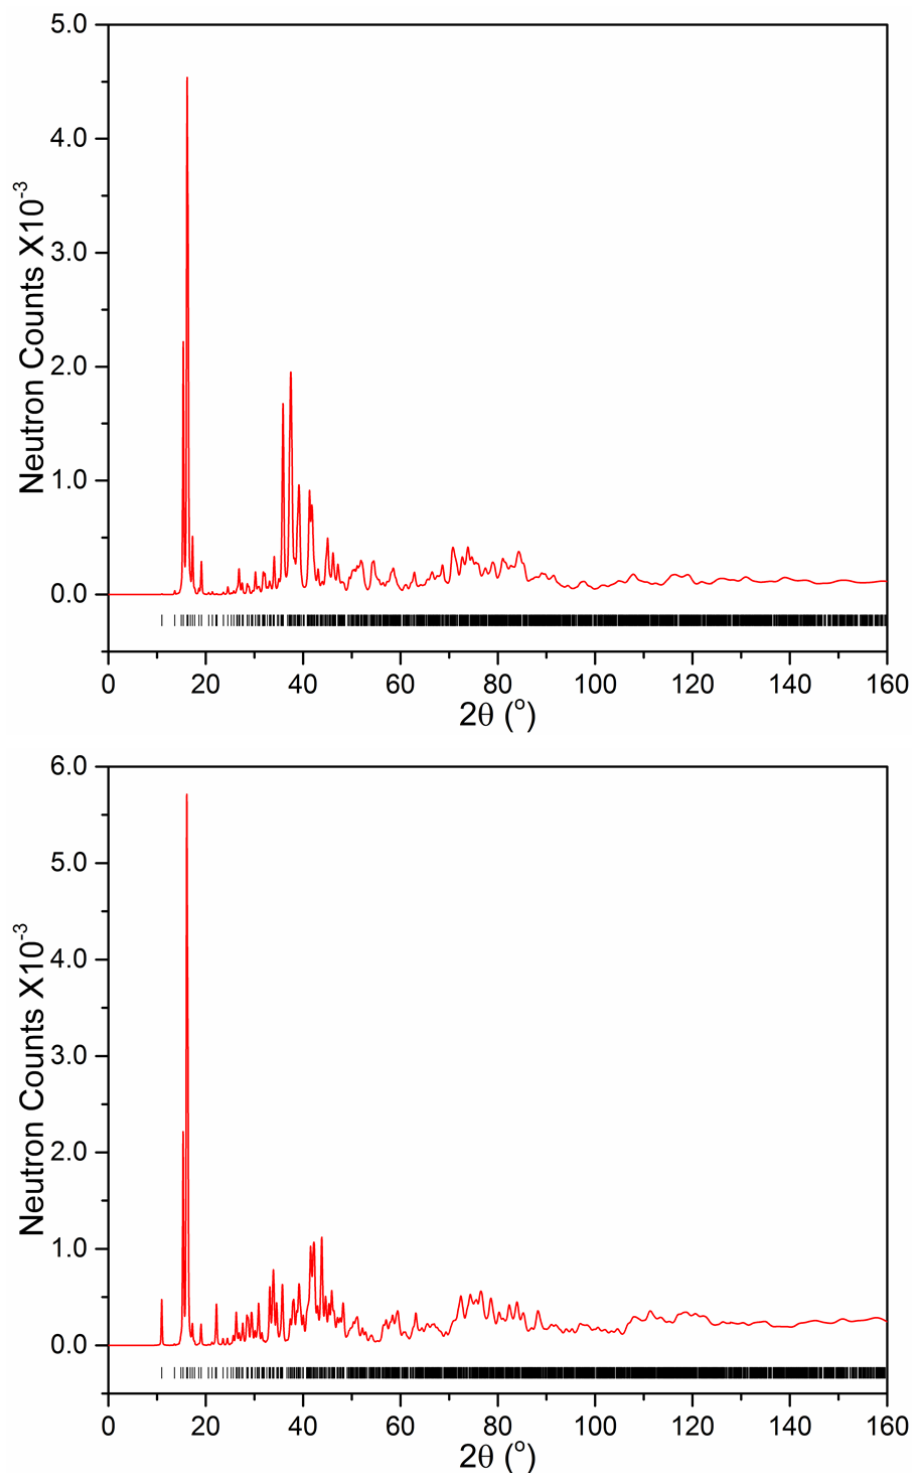

**Fig. S1** Comparison of the simulated  $\text{Na}_2^{11}\text{B}_{10}\text{D}_{10}$  NPD patterns (assuming  $\lambda=1.5398 \text{ \AA}$ ) for the (top) modified 2.5 K and (bottom) published [from K. Hofmann and B. Albert, *Z. Kristallogr.*, 2005, **220**, 142-146] 100 K structures, clearly indicating the broad disagreement between the two structure models and confirming the substantial sensitivity of NPD to the particular structural details.

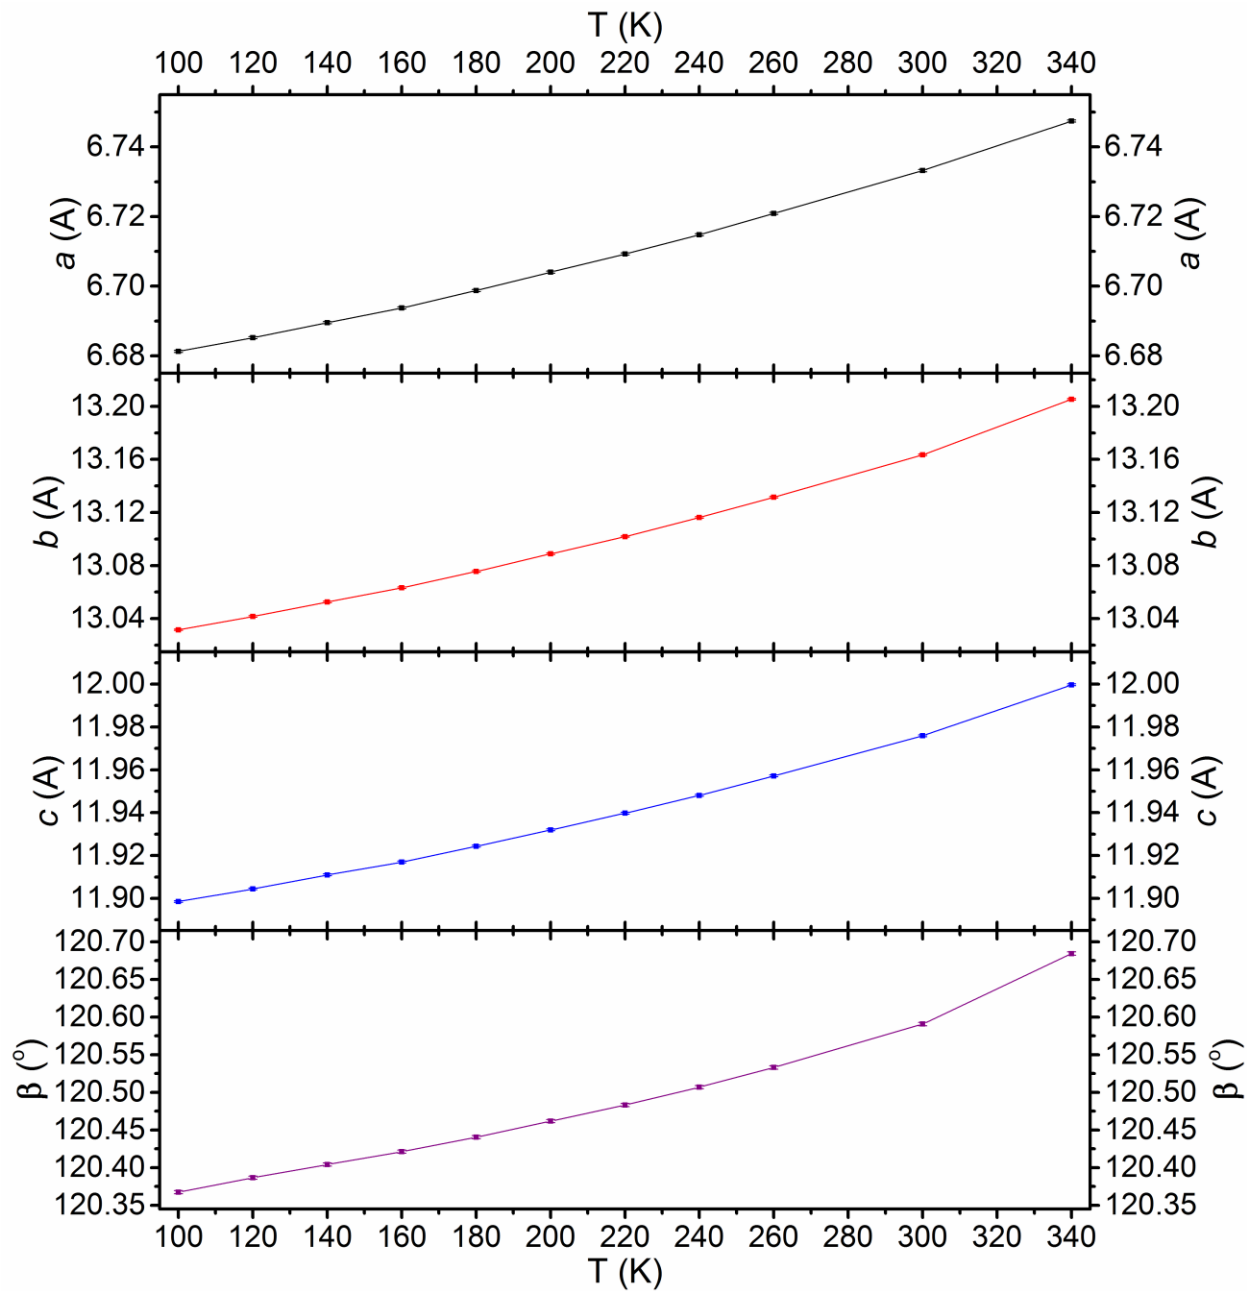

**Fig. S2** Plot of the monoclinic lattice parameters versus temperature for  $\text{Na}_2\text{B}_{10}\text{H}_{10}$  based on synchrotron XRPD data. Standard uncertainties are smaller than the symbol size.

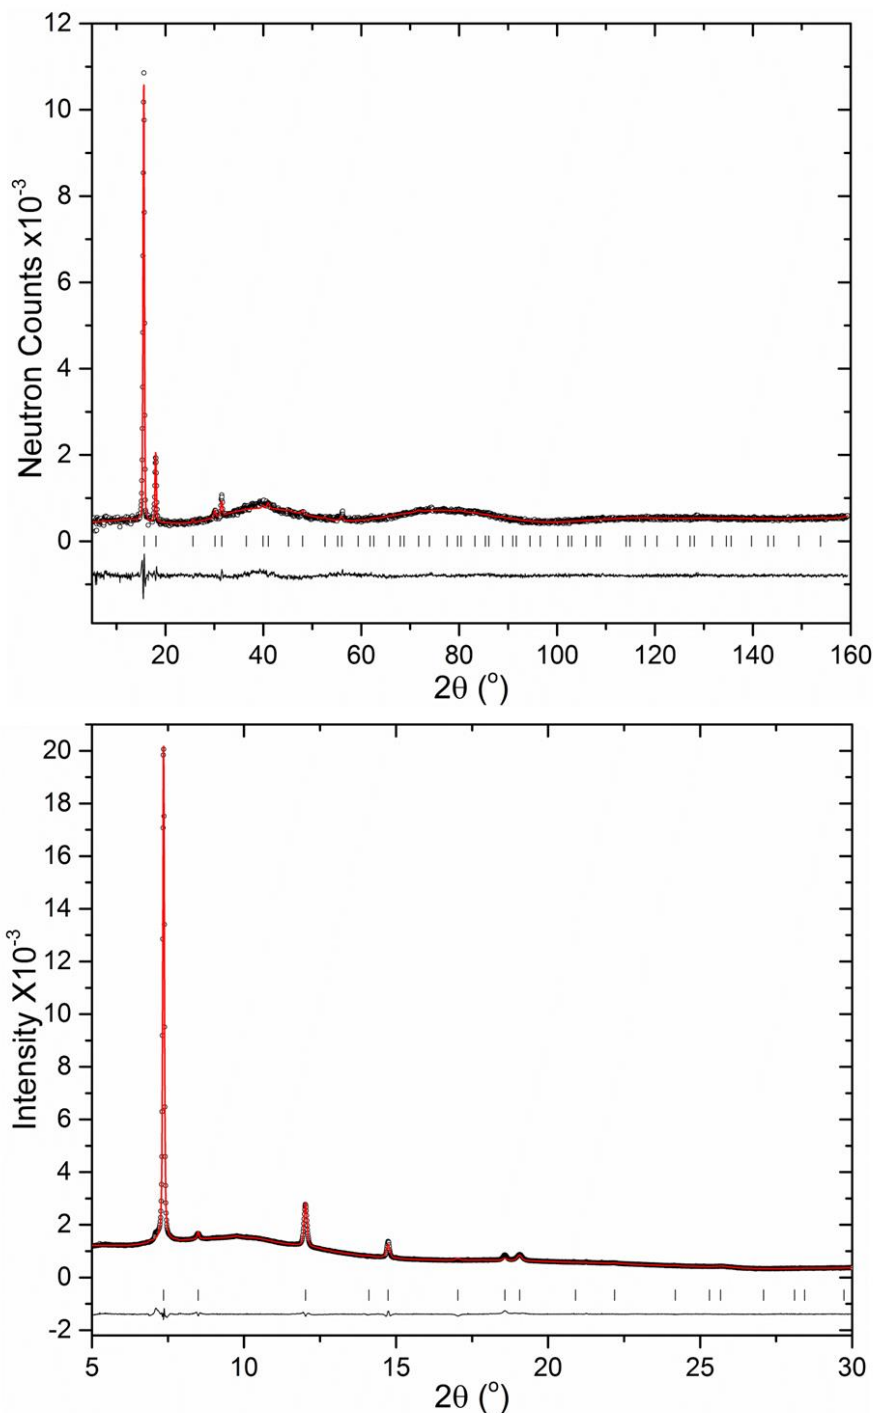

**Fig. S3** Experimental (circles), fitted (line), and difference (line below observed and calculated patterns) profiles at 410 K for the high-temperature cubic structure [space group  $Fm-3m$ ; from T. J. Udovic et al., *Adv. Mater.*, 2014, **26**, 7622-7626] of (top) Na<sub>2</sub><sup>11</sup>B<sub>10</sub>D<sub>10</sub> (NPD,  $\lambda=1.5398(2)$  Å,  $a=9.8397(5)$  Å,  $R_{wp}=0.0491$ ,  $R_p=0.0412$ ,  $\chi^2=1.403$ ) and (bottom) Na<sub>2</sub>B<sub>10</sub>H<sub>10</sub> (synchrotron XRPD,  $\lambda=0.7296(1)$  Å,  $a=9.8517(6)$ ,  $R_p=0.136$ ,  $R_{wp}=0.0924$ ,  $\chi^2=0.482$ ). Vertical bars indicate the calculated positions of the Bragg peaks. This structure is the same as that reported by Udovic et al. except for small changes in the Na site occupancies. (See Tables S5 and S6.) Standard uncertainties are commensurate with the scatter in the data.

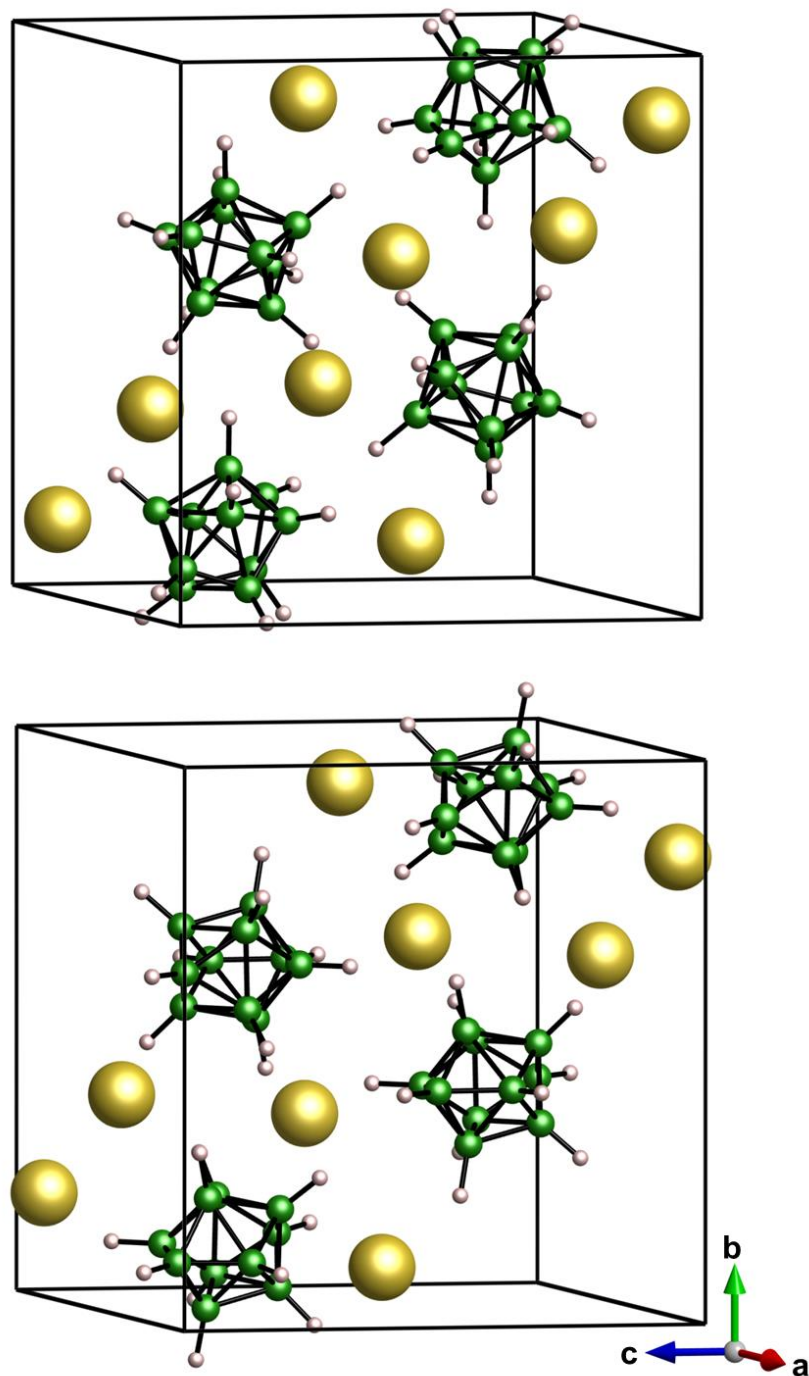

**Fig. S4** Comparison of the published monoclinic  $\text{Na}_2\text{B}_{10}\text{H}_{10}$  crystal structure [from K. Hofmann and B. Albert, *Z. Kristallogr.*, 2005, **220**, 142-146] (top) before and (bottom) after energy-optimization. Yellow, green, and white spheres denote Na, B, and D atoms, respectively. Although the energy-optimized structure is the nearest stable configuration to the published structure, there are significant differences between the two structures with respect to anion distortions and orientations and cation positions.

**Table S1.** The refined Na<sub>2</sub><sup>11</sup>B<sub>10</sub>D<sub>10</sub> structural parameters at 2.5 K associated with the monoclinic space group *P*2<sub>1</sub>/*c* (No.14) derived from NPD data.

| Na <sub>2</sub> <sup>11</sup> B <sub>10</sub> D <sub>10</sub>                                                                              |            | T = 2.5 K |           |           | NPD Cu(311)/λ=1.5398(2) Å          |      |
|--------------------------------------------------------------------------------------------------------------------------------------------|------------|-----------|-----------|-----------|------------------------------------|------|
| <i>a</i> = 6.6535(5) Å; <i>b</i> = 12.964(1) Å; <i>c</i> = 11.8510(9) Å; γ=120.203(4) °; <i>V</i> = 883.4(1) Å <sup>3</sup> ; <i>Z</i> = 4 |            |           |           |           |                                    |      |
| Atom                                                                                                                                       | Site       | <i>x</i>  | <i>y</i>  | <i>z</i>  | U <sub>iso</sub> (Å <sup>2</sup> ) | Occ. |
| Na1                                                                                                                                        | 4 <i>e</i> | 0.239(3)  | 0.394(2)  | 0.492(2)  | 0.030(3)                           | 1    |
| Na2                                                                                                                                        | 4 <i>e</i> | 0.216(3)  | 0.630(2)  | 0.015(2)  | 0.030(3)                           | 1    |
| B1                                                                                                                                         | 4 <i>e</i> | 0.5610(5) | 0.5103(2) | 0.7580(3) | 0.0144(2)                          | 1    |
| B2                                                                                                                                         | 4 <i>e</i> | 0.4361(5) | 0.5967(2) | 0.6170(2) | 0.0144(2)                          | 1    |
| B3                                                                                                                                         | 4 <i>e</i> | 0.5465(5) | 0.7198(2) | 0.6933(2) | 0.0144(2)                          | 1    |
| B4                                                                                                                                         | 4 <i>e</i> | 0.7372(4) | 0.6079(2) | 0.7438(3) | 0.0144(2)                          | 1    |
| B5                                                                                                                                         | 4 <i>e</i> | 0.2897(4) | 0.6692(2) | 0.6872(2) | 0.0144(2)                          | 1    |
| B6                                                                                                                                         | 4 <i>e</i> | 0.4144(5) | 0.5822(2) | 0.8284(2) | 0.0144(2)                          | 1    |
| B7                                                                                                                                         | 4 <i>e</i> | 0.7204(4) | 0.5980(2) | 0.8928(2) | 0.0144(2)                          | 1    |
| B8                                                                                                                                         | 4 <i>e</i> | 0.5293(5) | 0.7098(2) | 0.8431(2) | 0.0144(2)                          | 1    |
| B9                                                                                                                                         | 4 <i>e</i> | 0.2726(4) | 0.5390(2) | 0.6725(3) | 0.0144(2)                          | 1    |
| B10                                                                                                                                        | 4 <i>e</i> | 0.7846(5) | 0.7106(2) | 0.8439(3) | 0.0144(2)                          | 1    |
| D1                                                                                                                                         | 4 <i>e</i> | 0.6218(6) | 0.4221(2) | 0.7663(4) | 0.0233(4)                          | 1    |
| D2                                                                                                                                         | 4 <i>e</i> | 0.3890(6) | 0.5842(3) | 0.5056(2) | 0.0233(4)                          | 1    |
| D3                                                                                                                                         | 4 <i>e</i> | 0.5432(7) | 0.7922(2) | 0.6292(3) | 0.0233(4)                          | 1    |
| D4                                                                                                                                         | 4 <i>e</i> | 0.8890(5) | 0.5818(3) | 0.7233(4) | 0.0233(4)                          | 1    |
| D5                                                                                                                                         | 4 <i>e</i> | 0.1176(5) | 0.7224(3) | 0.6406(4) | 0.0233(4)                          | 1    |
| D6                                                                                                                                         | 4 <i>e</i> | 0.3466(6) | 0.5522(3) | 0.8991(3) | 0.0233(4)                          | 1    |
| D7                                                                                                                                         | 4 <i>e</i> | 0.8515(6) | 0.5629(3) | 0.9997(2) | 0.0233(4)                          | 1    |
| D8                                                                                                                                         | 4 <i>e</i> | 0.4820(7) | 0.7709(2) | 0.9024(3) | 0.0233(4)                          | 1    |
| D9                                                                                                                                         | 4 <i>e</i> | 0.1078(5) | 0.4824(3) | 0.6226(3) | 0.0233(4)                          | 1    |
| D10                                                                                                                                        | 4 <i>e</i> | 0.9491(6) | 0.7675(3) | 0.8946(3) | 0.0233(4)                          | 1    |

**Table S2.** The refined  $\text{Na}_2^{11}\text{B}_{10}\text{D}_{10}$  structural parameters at 295 K associated with the monoclinic space group  $P2_1/c$  (No.14) derived from NPD data.

| $\text{Na}_2^{11}\text{B}_{10}\text{D}_{10}$                                                                              |      | <b>T = 295 K</b> |           |           | <b>NPD Cu(311)/<math>\lambda=1.5398(2)</math> Å</b> |      |
|---------------------------------------------------------------------------------------------------------------------------|------|------------------|-----------|-----------|-----------------------------------------------------|------|
| $a = 6.7137(7)$ Å; $b = 13.124(1)$ Å; $c = 11.940(1)$ Å; $\gamma = 120.524(6)$ °; $V = 906.2(2)$ Å <sup>3</sup> ; $Z = 4$ |      |                  |           |           |                                                     |      |
| Atom                                                                                                                      | Site | <i>x</i>         | <i>y</i>  | <i>z</i>  | $U_{\text{iso}}$ (Å <sup>2</sup> )                  | Occ. |
| <b>Na1</b>                                                                                                                | 4e   | 0.217(6)         | 0.399(3)  | 0.484(4)  | 0.094(7)                                            | 1    |
| <b>Na2</b>                                                                                                                | 4e   | 0.224(6)         | 0.625(3)  | -0.012(4) | 0.094(7)                                            | 1    |
| <b>B1</b>                                                                                                                 | 4e   | 0.5645(8)        | 0.5121(2) | 0.7598(4) | 0.0287(3)                                           | 1    |
| <b>B2</b>                                                                                                                 | 4e   | 0.4351(7)        | 0.5967(3) | 0.6188(4) | 0.0287(3)                                           | 1    |
| <b>B3</b>                                                                                                                 | 4e   | 0.5424(8)        | 0.7190(2) | 0.6937(4) | 0.0287(3)                                           | 1    |
| <b>B4</b>                                                                                                                 | 4e   | 0.7352(6)        | 0.6096(3) | 0.7442(5) | 0.0287(3)                                           | 1    |
| <b>B5</b>                                                                                                                 | 4e   | 0.2902(6)        | 0.6675(3) | 0.6890(5) | 0.0287(3)                                           | 1    |
| <b>B6</b>                                                                                                                 | 4e   | 0.4195(7)        | 0.5822(3) | 0.8303(4) | 0.0287(3)                                           | 1    |
| <b>B7</b>                                                                                                                 | 4e   | 0.7227(6)        | 0.5996(3) | 0.8933(4) | 0.0287(3)                                           | 1    |
| <b>B8</b>                                                                                                                 | 4e   | 0.5296(7)        | 0.7089(3) | 0.8435(4) | 0.0287(3)                                           | 1    |
| <b>B9</b>                                                                                                                 | 4e   | 0.2769(7)        | 0.5388(3) | 0.6754(4) | 0.0287(3)                                           | 1    |
| <b>B10</b>                                                                                                                | 4e   | 0.7815(7)        | 0.7112(3) | 0.8433(5) | 0.0287(3)                                           | 1    |
| <b>D1</b>                                                                                                                 | 4e   | 0.627(1)         | 0.4253(2) | 0.7685(6) | 0.0489(7)                                           | 1    |
| <b>D2</b>                                                                                                                 | 4e   | 0.386(1)         | 0.5842(4) | 0.5077(4) | 0.0489(7)                                           | 1    |
| <b>D3</b>                                                                                                                 | 4e   | 0.536(1)         | 0.7905(3) | 0.6291(5) | 0.0489(7)                                           | 1    |
| <b>D4</b>                                                                                                                 | 4e   | 0.8853(8)        | 0.5846(4) | 0.7232(6) | 0.0489(7)                                           | 1    |
| <b>D5</b>                                                                                                                 | 4e   | 0.1177(7)        | 0.7190(4) | 0.6428(6) | 0.0489(7)                                           | 1    |
| <b>D6</b>                                                                                                                 | 4e   | 0.355(1)         | 0.5522(4) | 0.9015(5) | 0.0489(7)                                           | 1    |
| <b>D7</b>                                                                                                                 | 4e   | 0.8558(8)        | 0.5656(4) | 0.9998(4) | 0.0489(7)                                           | 1    |
| <b>D8</b>                                                                                                                 | 4e   | 0.482(1)         | 0.7689(3) | 0.9026(6) | 0.0489(7)                                           | 1    |
| <b>D9</b>                                                                                                                 | 4e   | 0.1145(9)        | 0.4820(4) | 0.6267(5) | 0.0489(7)                                           | 1    |
| <b>D10</b>                                                                                                                | 4e   | 0.9435(8)        | 0.7683(4) | 0.8928(6) | 0.0489(7)                                           | 1    |

**Table S3.** The refined Na<sub>2</sub>B<sub>10</sub>H<sub>10</sub> structural parameters at 100 K associated with the monoclinic space group *P*2<sub>1</sub>/*c* (No. 14) derived from XRPD data (*R*<sub>p</sub>=0.0811, *R*<sub>wp</sub>=0.0732,  $\chi^2$ =0.379).

| Na <sub>2</sub> B <sub>10</sub> H <sub>10</sub>                                                                                                     |            | T = 100 K |           |           | XRPD                               | $\lambda=0.7296(1)$ Å |
|-----------------------------------------------------------------------------------------------------------------------------------------------------|------------|-----------|-----------|-----------|------------------------------------|-----------------------|
| <i>a</i> = 6.6812(3) Å; <i>b</i> = 13.0314(6) Å; <i>c</i> = 11.8984(4) Å; $\gamma=120.368(2)$ °; <i>V</i> = 893.81(6) Å <sup>3</sup> ; <i>Z</i> = 4 |            |           |           |           |                                    |                       |
| Atom                                                                                                                                                | Site       | <i>x</i>  | <i>y</i>  | <i>z</i>  | U <sub>iso</sub> (Å <sup>2</sup> ) | Occ.                  |
| Na1                                                                                                                                                 | 4 <i>e</i> | 0.229(1)  | 0.3877(7) | 0.4845(7) | 0.028(1)                           | 1                     |
| Na2                                                                                                                                                 | 4 <i>e</i> | 0.201(1)  | 0.6296(8) | 0.0064(7) | 0.028(1)                           | 1                     |
| B1                                                                                                                                                  | 4 <i>e</i> | 0.561(1)  | 0.5124(4) | 0.7595(7) | 0.008(1)                           | 1                     |
| B2                                                                                                                                                  | 4 <i>e</i> | 0.436(1)  | 0.5961(5) | 0.6161(5) | 0.008(1)                           | 1                     |
| B3                                                                                                                                                  | 4 <i>e</i> | 0.540(1)  | 0.7193(4) | 0.6887(6) | 0.008(1)                           | 1                     |
| B4                                                                                                                                                  | 4 <i>e</i> | 0.735(1)  | 0.6101(5) | 0.7438(6) | 0.008(1)                           | 1                     |
| B5                                                                                                                                                  | 4 <i>e</i> | 0.2825(9) | 0.6678(5) | 0.6828(6) | 0.008(1)                           | 1                     |
| B6                                                                                                                                                  | 4 <i>e</i> | 0.409(1)  | 0.5846(5) | 0.8273(6) | 0.008(1)                           | 1                     |
| B7                                                                                                                                                  | 4 <i>e</i> | 0.714(1)  | 0.6025(5) | 0.8919(5) | 0.008(1)                           | 1                     |
| B8                                                                                                                                                  | 4 <i>e</i> | 0.519(1)  | 0.7111(5) | 0.8388(7) | 0.008(1)                           | 1                     |
| B9                                                                                                                                                  | 4 <i>e</i> | 0.271(1)  | 0.5391(5) | 0.6724(7) | 0.008(1)                           | 1                     |
| B10                                                                                                                                                 | 4 <i>e</i> | 0.774(1)  | 0.7141(5) | 0.8401(7) | 0.008(1)                           | 1                     |
| H1                                                                                                                                                  | 4 <i>e</i> | 0.625(2)  | 0.4251(4) | 0.7712(9) | 0.009(9)                           | 1                     |
| H2                                                                                                                                                  | 4 <i>e</i> | 0.391(2)  | 0.5812(7) | 0.5065(5) | 0.009(9)                           | 1                     |
| H3                                                                                                                                                  | 4 <i>e</i> | 0.534(2)  | 0.7905(5) | 0.6235(8) | 0.009(9)                           | 1                     |
| H4                                                                                                                                                  | 4 <i>e</i> | 0.888(1)  | 0.5840(7) | 0.7265(9) | 0.009(9)                           | 1                     |
| H5                                                                                                                                                  | 4 <i>e</i> | 0.110(1)  | 0.7200(6) | 0.6340(9) | 0.009(9)                           | 1                     |
| H6                                                                                                                                                  | 4 <i>e</i> | 0.342(2)  | 0.5557(7) | 0.8970(8) | 0.009(9)                           | 1                     |
| H7                                                                                                                                                  | 4 <i>e</i> | 0.845(1)  | 0.5696(7) | 1.0000(5) | 0.009(9)                           | 1                     |
| H8                                                                                                                                                  | 4 <i>e</i> | 0.468(2)  | 0.7734(6) | 0.8946(8) | 0.009(9)                           | 1                     |
| H9                                                                                                                                                  | 4 <i>e</i> | 0.110(1)  | 0.4810(7) | 0.6235(9) | 0.009(9)                           | 1                     |
| H10                                                                                                                                                 | 4 <i>e</i> | 0.936(1)  | 0.7718(7) | 0.8900(9) | 0.009(9)                           | 1                     |



**Table S4.** The refined Na<sub>2</sub>B<sub>10</sub>H<sub>10</sub> structural parameters at 300 K associated with the monoclinic space group *P*2<sub>1</sub>/*c* (No. 14) derived from XRPD data (*R*<sub>p</sub>=0.0836, *R*<sub>wp</sub>=0.0715,  $\chi^2$ =0.332).

| Na <sub>2</sub> B <sub>10</sub> H <sub>10</sub>                                                                                                     |            | T = 300 K |           |           | XRPD                               | $\lambda=0.7296(1)$ Å |
|-----------------------------------------------------------------------------------------------------------------------------------------------------|------------|-----------|-----------|-----------|------------------------------------|-----------------------|
| <i>a</i> = 6.7333(3) Å; <i>b</i> = 13.1637(6) Å; <i>c</i> = 11.9761(4) Å; $\gamma=120.591(2)$ °; <i>V</i> = 913.76(7) Å <sup>3</sup> ; <i>Z</i> = 4 |            |           |           |           |                                    |                       |
| Atom                                                                                                                                                | Site       | <i>x</i>  | <i>y</i>  | <i>z</i>  | U <sub>iso</sub> (Å <sup>2</sup> ) | Occ.                  |
| Na1                                                                                                                                                 | 4 <i>e</i> | 0.234(1)  | 0.3896(7) | 0.4803(7) | 0.035(1)                           | 1                     |
| Na2                                                                                                                                                 | 4 <i>e</i> | 0.205(1)  | 0.6344(7) | 0.0060(8) | 0.035(1)                           | 1                     |
| B1                                                                                                                                                  | 4 <i>e</i> | 0.562(1)  | 0.5134(4) | 0.7615(7) | 0.006(1)                           | 1                     |
| B2                                                                                                                                                  | 4 <i>e</i> | 0.436(1)  | 0.5962(5) | 0.6173(6) | 0.006(1)                           | 1                     |
| B3                                                                                                                                                  | 4 <i>e</i> | 0.540(1)  | 0.7179(5) | 0.6892(7) | 0.006(1)                           | 1                     |
| B4                                                                                                                                                  | 4 <i>e</i> | 0.735(1)  | 0.6101(6) | 0.7454(7) | 0.006(1)                           | 1                     |
| B5                                                                                                                                                  | 4 <i>e</i> | 0.284(1)  | 0.6671(5) | 0.6823(7) | 0.006(1)                           | 1                     |
| B6                                                                                                                                                  | 4 <i>e</i> | 0.409(1)  | 0.5851(5) | 0.8264(7) | 0.006(1)                           | 1                     |
| B7                                                                                                                                                  | 4 <i>e</i> | 0.712(1)  | 0.6028(5) | 0.8920(6) | 0.006(1)                           | 1                     |
| B8                                                                                                                                                  | 4 <i>e</i> | 0.518(1)  | 0.7102(5) | 0.8378(7) | 0.006(1)                           | 1                     |
| B9                                                                                                                                                  | 4 <i>e</i> | 0.274(1)  | 0.5395(5) | 0.6724(7) | 0.006(1)                           | 1                     |
| B10                                                                                                                                                 | 4 <i>e</i> | 0.774(1)  | 0.7131(5) | 0.8411(7) | 0.006(1)                           | 1                     |
| H1                                                                                                                                                  | 4 <i>e</i> | 0.626(2)  | 0.4271(4) | 0.773(1)  | 0.011(9)                           | 1                     |
| H2                                                                                                                                                  | 4 <i>e</i> | 0.394(2)  | 0.5811(8) | 0.5086(6) | 0.011(9)                           | 1                     |
| H3                                                                                                                                                  | 4 <i>e</i> | 0.535(2)  | 0.7886(6) | 0.6248(8) | 0.011(9)                           | 1                     |
| H4                                                                                                                                                  | 4 <i>e</i> | 0.888(1)  | 0.5843(7) | 0.729(1)  | 0.011(9)                           | 1                     |
| H5                                                                                                                                                  | 4 <i>e</i> | 0.112(1)  | 0.7185(7) | 0.6330(9) | 0.011(9)                           | 1                     |
| H6                                                                                                                                                  | 4 <i>e</i> | 0.342(2)  | 0.5567(7) | 0.8954(8) | 0.011(9)                           | 1                     |
| H7                                                                                                                                                  | 4 <i>e</i> | 0.843(1)  | 0.5707(7) | 1.0001(6) | 0.011(9)                           | 1                     |
| H8                                                                                                                                                  | 4 <i>e</i> | 0.467(2)  | 0.7721(6) | 0.8927(9) | 0.011(9)                           | 1                     |
| H9                                                                                                                                                  | 4 <i>e</i> | 0.114(1)  | 0.4818(7) | 0.623(1)  | 0.011(9)                           | 1                     |
| H10                                                                                                                                                 | 4 <i>e</i> | 0.934(1)  | 0.7707(7) | 0.891(1)  | 0.011(9)                           | 1                     |

**Table S5.** The refined  $\text{Na}_2^{11}\text{B}_{10}\text{D}_{10}$  structural parameters at 410 K associated with the cubic space group  $Fm-3m$  (No. 225) derived from NPD data ( $R_{\text{wp}}=0.0491$ ,  $R_p=0.0412$ ,  $\chi^2=1.403$ ).

| $\text{Na}_2^{11}\text{B}_{10}\text{D}_{10}$               |       | <b>T = 410 K</b> |               |               | <b>NPD <math>\text{Cu}(311)/\lambda=1.5398(2)</math> Å</b> |               |
|------------------------------------------------------------|-------|------------------|---------------|---------------|------------------------------------------------------------|---------------|
| $a = 9.8397(5)$ Å; $V = 952.7(1)$ Å <sup>3</sup> ; $Z = 4$ |       |                  |               |               |                                                            |               |
| Atom                                                       | Site  | $x$              | $y$           | $z$           | $U_{\text{iso}}$ (Å <sup>2</sup> )                         | Occ.          |
| <b>B1</b>                                                  | $24e$ | 0.1864(4)        | 0             | 0             | 0.119(6)                                                   | $\frac{1}{3}$ |
| <b>B2</b>                                                  | $96k$ | 0.0634(4)        | 0.0625(4)     | 0.1279(7)     | 0.135(6)                                                   | $\frac{1}{3}$ |
| <b>D1</b>                                                  | $24e$ | 0.3058(4)        | 0             | 0             | 0.35(1)                                                    | $\frac{1}{3}$ |
| <b>D2</b>                                                  | $96k$ | 0.1103(4)        | 0.1105(4)     | 0.226(2)      | 0.35(1)                                                    | $\frac{1}{3}$ |
| <b>Na1</b>                                                 | $8c$  | $\frac{1}{4}$    | $\frac{1}{4}$ | $\frac{1}{4}$ | 0.09                                                       | 0.54(2)       |
| <b>Na2</b>                                                 | $4b$  | $\frac{1}{2}$    | 0             | 0             | 0.09                                                       | 0.11(3)       |
| <b>Na3</b>                                                 | $24d$ | $\frac{1}{4}$    | $\frac{1}{4}$ | 0             | 0.19                                                       | 0.10(1)       |

**Table S6.** The refined  $\text{Na}_2\text{B}_{10}\text{H}_{10}$  structural parameters at 410 K associated with the cubic space group  $Fm-3m$  (No. 225) derived from synchrotron XRPD data ( $R_p=0.136$ ,  $R_{\text{wp}}=0.0924$ ,  $\chi^2=0.482$ ).

| $\text{Na}_2\text{B}_{10}\text{H}_{10}$                     |       | <b>T = 410 K</b> |               |               | <b>XRPD <math>\lambda=0.7296(1)</math> Å</b> |               |
|-------------------------------------------------------------|-------|------------------|---------------|---------------|----------------------------------------------|---------------|
| $a = 9.8517(6)$ Å; $V = 956.16(9)$ Å <sup>3</sup> ; $Z = 4$ |       |                  |               |               |                                              |               |
| Atom                                                        | Site  | $x$              | $y$           | $z$           | $U_{\text{iso}}$ (Å <sup>2</sup> )           | Occ.          |
| <b>B1</b>                                                   | $24e$ | 0.1852(6)        | 0             | 0             | 0.05                                         | $\frac{1}{3}$ |
| <b>B2</b>                                                   | $96k$ | 0.0632(3)        | 0.0632(3)     | 0.1284(4)     | 0.23                                         | $\frac{1}{3}$ |
| <b>Na1</b>                                                  | $8c$  | $\frac{1}{4}$    | $\frac{1}{4}$ | $\frac{1}{4}$ | 0.27                                         | 0.742(5)      |
| <b>Na2</b>                                                  | $4b$  | $\frac{1}{2}$    | 0             | 0             | 0.60                                         | 0.06(1)       |
| <b>Na3</b>                                                  | $24d$ | $\frac{1}{4}$    | $\frac{1}{4}$ | 0             | 0.56                                         | 0.056(8)      |

N.B.: H atom positions were ignored during the refinement.

**Table S7.** List of phonon symmetries and the corresponding phonon energies [Symmetry, Energy (meV), Energy ( $\text{cm}^{-1}$ )] at the gamma point from the DFT-optimized  $\text{Na}_2^{11}\text{B}_{10}\text{H}_{10}$  structure at 0 K. All modes are nondegenerate. Modes below  $200 \text{ cm}^{-1}$  possess cation and whole-anion translational and/or librational character. (N.B.: Infrared-active modes = Au, Bu and Raman-active modes = Ag, Bg.)

| Sym | E(meV) | E( $\text{cm}^{-1}$ ) |
|-----|--------|-----------------------|-----|--------|-----------------------|-----|--------|-----------------------|-----|--------|-----------------------|-----|--------|-----------------------|
| Au  | 3.6    | 29.21                 | Bg  | 59.1   | 476.70                | Au  | 87.5   | 706.06                | Au  | 109.0  | 879.61                | Ag  | 126.5  | 1020.51               |
| Ag  | 5.2    | 42.00                 | Au  | 59.1   | 476.99                | Bu  | 88.1   | 710.76                | Bg  | 109.2  | 880.70                | Bg  | 126.6  | 1021.72               |
| Ag  | 7.6    | 61.01                 | Bg  | 59.4   | 478.91                | Bg  | 88.3   | 712.07                | Ag  | 109.2  | 880.78                | Ag  | 127.0  | 1024.68               |
| Bg  | 7.7    | 62.39                 | Bu  | 59.4   | 478.99                | Ag  | 88.3   | 712.71                | Au  | 110.2  | 888.77                | Au  | 127.0  | 1024.71               |
| Au  | 8.2    | 66.13                 | Ag  | 59.5   | 480.25                | Au  | 90.5   | 729.71                | Bu  | 110.4  | 890.48                | Bu  | 127.1  | 1025.02               |
| Bu  | 8.5    | 68.59                 | Bu  | 65.9   | 531.88                | Bu  | 90.5   | 729.78                | Au  | 110.7  | 892.84                | Bg  | 127.2  | 1025.84               |
| Ag  | 8.7    | 69.91                 | Bu  | 66.0   | 532.42                | Ag  | 91.1   | 734.98                | Bu  | 110.7  | 892.96                | Bu  | 133.5  | 1076.79               |
| Au  | 8.7    | 70.28                 | Ag  | 66.0   | 532.45                | Bg  | 91.1   | 735.09                | Bg  | 110.7  | 893.11                | Au  | 133.5  | 1077.00               |
| Bg  | 8.9    | 72.10                 | Au  | 66.1   | 533.08                | Au  | 91.5   | 738.35                | Ag  | 110.7  | 893.34                | Ag  | 133.6  | 1077.75               |
| Au  | 9.8    | 78.67                 | Bg  | 66.2   | 533.71                | Bu  | 91.6   | 738.93                | Au  | 110.9  | 894.63                | Bg  | 133.6  | 1077.77               |
| Bu  | 9.8    | 79.14                 | Au  | 66.3   | 534.75                | Ag  | 91.8   | 740.59                | Bu  | 110.9  | 895.01                | Bu  | 306.6  | 2473.28               |
| Ag  | 10.5   | 85.03                 | Bg  | 66.6   | 536.97                | Bg  | 91.9   | 741.48                | Bg  | 111.0  | 895.43                | Au  | 306.6  | 2473.49               |
| Bg  | 10.6   | 85.46                 | Ag  | 66.7   | 537.82                | Bu  | 92.2   | 744.06                | Ag  | 111.0  | 895.59                | Bg  | 307.9  | 2483.87               |
| Bu  | 10.7   | 86.25                 | Au  | 71.2   | 574.10                | Au  | 92.3   | 744.56                | Bg  | 111.1  | 896.17                | Ag  | 307.9  | 2484.27               |
| Ag  | 10.8   | 87.12                 | Bg  | 71.7   | 578.38                | Bg  | 92.7   | 747.85                | Ag  | 111.2  | 897.08                | Au  | 308.4  | 2487.72               |
| Au  | 10.9   | 88.26                 | Bu  | 71.7   | 578.81                | Ag  | 92.8   | 748.83                | Bu  | 112.2  | 904.88                | Bu  | 308.4  | 2487.77               |
| Bg  | 11.9   | 95.90                 | Ag  | 72.1   | 581.85                | Au  | 93.5   | 754.61                | Au  | 112.4  | 906.76                | Ag  | 308.5  | 2488.85               |
| Bg  | 12.3   | 99.36                 | Au  | 72.5   | 584.99                | Bg  | 94.0   | 758.11                | Bg  | 112.4  | 906.80                | Bg  | 308.7  | 2490.15               |
| Ag  | 12.4   | 99.76                 | Bu  | 72.9   | 588.22                | Bu  | 94.2   | 759.69                | Ag  | 112.6  | 908.02                | Bu  | 309.5  | 2496.94               |
| Au  | 12.6   | 101.59                | Ag  | 72.9   | 588.51                | Ag  | 94.5   | 762.55                | Au  | 112.8  | 909.77                | Au  | 310.0  | 2500.58               |
| Ag  | 13.2   | 106.63                | Bg  | 73.3   | 591.09                | Bu  | 96.4   | 777.66                | Bu  | 112.8  | 910.41                | Ag  | 310.5  | 2505.28               |
| Bu  | 13.3   | 107.24                | Bu  | 75.6   | 609.77                | Bg  | 96.4   | 777.76                | Ag  | 112.9  | 910.69                | Bg  | 310.6  | 2505.98               |
| Bg  | 14.4   | 115.98                | Bg  | 75.6   | 610.20                | Ag  | 96.7   | 780.25                | Bg  | 113.1  | 912.79                | Bu  | 313.3  | 2527.86               |
| Ag  | 14.5   | 117.15                | Au  | 75.7   | 610.78                | Au  | 96.9   | 781.52                | Au  | 114.3  | 921.81                | Ag  | 313.4  | 2528.49               |
| Bu  | 14.7   | 118.83                | Ag  | 75.9   | 612.43                | Ag  | 97.5   | 786.66                | Bu  | 114.4  | 922.60                | Au  | 313.8  | 2531.92               |
| Bu  | 15.4   | 123.95                | Bu  | 76.6   | 618.21                | Au  | 97.6   | 787.60                | Bg  | 114.4  | 922.87                | Bg  | 314.0  | 2533.59               |
| Bg  | 16.0   | 129.30                | Bg  | 76.8   | 619.85                | Bu  | 97.7   | 788.25                | Ag  | 114.5  | 923.47                | Bu  | 314.1  | 2534.20               |
| Bu  | 16.3   | 131.65                | Au  | 76.9   | 620.08                | Bg  | 97.8   | 788.68                | Bu  | 114.8  | 926.26                | Au  | 314.2  | 2534.77               |
| Ag  | 16.4   | 132.04                | Ag  | 76.9   | 620.73                | Au  | 98.9   | 797.85                | Ag  | 114.8  | 926.44                | Ag  | 314.2  | 2534.92               |
| Bg  | 16.4   | 132.51                | Bu  | 77.0   | 621.46                | Bg  | 99.1   | 799.13                | Au  | 114.9  | 926.75                | Bg  | 314.3  | 2535.92               |
| Au  | 17.1   | 137.96                | Au  | 77.2   | 622.55                | Ag  | 99.1   | 799.24                | Bg  | 114.9  | 926.79                | Au  | 315.0  | 2541.01               |
| Bg  | 17.8   | 143.75                | Bg  | 77.3   | 623.55                | Bu  | 99.1   | 799.66                | Bu  | 115.9  | 934.71                | Bu  | 315.0  | 2541.60               |
| Bu  | 18.0   | 145.36                | Ag  | 77.4   | 624.70                | Au  | 102.7  | 828.73                | Au  | 115.9  | 935.32                | Bg  | 315.1  | 2542.33               |
| Au  | 18.3   | 147.34                | Bu  | 81.9   | 660.86                | Bu  | 102.9  | 830.22                | Ag  | 116.0  | 935.43                | Ag  | 315.1  | 2542.47               |
| Ag  | 18.6   | 150.21                | Au  | 82.2   | 662.84                | Bg  | 103.1  | 831.38                | Bg  | 116.0  | 935.45                | Bu  | 315.3  | 2543.55               |
| Au  | 19.1   | 154.26                | Bg  | 82.3   | 663.83                | Ag  | 103.1  | 831.54                | Au  | 119.3  | 962.12                | Au  | 315.5  | 2545.20               |
| Bg  | 19.4   | 156.35                | Ag  | 82.3   | 663.92                | Bu  | 103.7  | 836.82                | Ag  | 119.3  | 962.14                | Ag  | 315.6  | 2545.99               |
| Bg  | 20.5   | 165.54                | Bu  | 82.4   | 664.46                | Bg  | 103.9  | 837.87                | Bu  | 119.3  | 962.80                | Au  | 315.7  | 2547.02               |
| Bu  | 21.1   | 169.95                | Ag  | 82.5   | 665.74                | Ag  | 103.9  | 838.04                | Bg  | 119.4  | 963.29                | Bg  | 315.8  | 2547.49               |
| Ag  | 21.5   | 173.59                | Au  | 82.5   | 665.76                | Au  | 104.0  | 838.81                | Au  | 119.8  | 966.36                | Bu  | 316.3  | 2551.47               |
| Au  | 21.8   | 175.92                | Bg  | 82.7   | 667.51                | Ag  | 106.3  | 857.21                | Ag  | 119.8  | 966.48                | Ag  | 316.4  | 2552.33               |
| Au  | 22.0   | 177.13                | Au  | 82.8   | 668.15                | Au  | 106.4  | 858.35                | Bg  | 119.8  | 966.70                | Bu  | 316.6  | 2553.97               |
| Ag  | 23.4   | 188.41                | Bu  | 83.0   | 669.57                | Bu  | 106.5  | 859.13                | Bu  | 119.9  | 967.41                | Au  | 316.7  | 2555.12               |
| Bg  | 23.6   | 190.16                | Ag  | 83.4   | 672.61                | Bg  | 106.7  | 860.92                | Bu  | 120.2  | 969.64                | Bg  | 316.8  | 2556.14               |
| Bu  | 24.4   | 196.60                | Bg  | 83.5   | 673.24                | Bu  | 106.8  | 861.84                | Bg  | 120.3  | 970.44                | Ag  | 317.3  | 2559.46               |
| Bu  | 56.8   | 458.03                | Bu  | 84.1   | 678.65                | Au  | 106.9  | 862.47                | Ag  | 120.4  | 971.55                | Bg  | 317.3  | 2559.65               |
| Au  | 57.3   | 461.92                | Au  | 84.5   | 681.41                | Bg  | 107.8  | 869.88                | Au  | 120.5  | 971.83                | Au  | 318.7  | 2571.40               |
| Bg  | 57.6   | 464.88                | Ag  | 84.5   | 682.10                | Ag  | 107.8  | 869.90                | Bu  | 125.8  | 1014.93               | Bu  | 318.8  | 2571.95               |
| Ag  | 57.7   | 465.48                | Bg  | 84.7   | 683.21                | Au  | 107.8  | 870.08                | Au  | 125.9  | 1016.06               | Bg  | 319.2  | 2575.01               |
| Au  | 58.7   | 473.54                | Au  | 86.6   | 698.98                | Bg  | 108.1  | 872.05                | Ag  | 126.0  | 1016.25               | Ag  | 319.3  | 2575.59               |
| Ag  | 58.9   | 475.33                | Bg  | 86.8   | 700.62                | Bu  | 108.2  | 872.94                | Bg  | 126.1  | 1016.98               |     |        |                       |
| Bu  | 59.1   | 476.45                | Bu  | 86.9   | 700.94                | Ag  | 108.3  | 873.99                | Au  | 126.4  | 1019.93               |     |        |                       |
|     |        |                       | Ag  | 87.0   | 701.73                | Bu  | 108.9  | 878.51                | Bu  | 126.5  | 1020.21               |     |        |                       |

**Table S8.** List of phonon symmetries and the corresponding phonon energies [Symmetry, Energy (meV), Energy ( $\text{cm}^{-1}$ )] at the gamma point from the DFT-optimized  $\text{Na}_2^{11}\text{B}_{10}\text{D}_{10}$  structure at 0 K. All modes are nondegenerate. Modes below  $200 \text{ cm}^{-1}$  possess cation and whole-anion translational and/or librational character. (N.B.: Infrared-active modes = Au, Bu and Raman-active modes = Ag, Bg.)

| Sym | E(meV) | E( $\text{cm}^{-1}$ ) |    |       |         |
|-----|--------|-----------------------|-----|--------|-----------------------|-----|--------|-----------------------|-----|--------|-----------------------|----|-------|---------|
| Au  | 3.5    | 28.25                 | Ag  | 53.5   | 431.26                | Bu  | 72.8   | 587.28                | Ag  | 88.7   | 715.35                | Ag | 113.2 | 913.23  |
| Ag  | 5.1    | 40.76                 | Au  | 53.6   | 432.76                | Au  | 72.8   | 587.28                | Au  | 88.7   | 715.54                | Bg | 113.3 | 914.09  |
| Ag  | 7.2    | 58.49                 | Ag  | 53.9   | 435.19                | Bg  | 72.9   | 587.77                | Bg  | 88.7   | 715.63                | Bu | 119.8 | 966.44  |
| Bg  | 7.5    | 60.56                 | Bu  | 54.0   | 435.31                | Ag  | 72.9   | 588.06                | Bu  | 89.8   | 724.80                | Bg | 119.9 | 967.21  |
| Au  | 7.9    | 63.86                 | Bg  | 54.0   | 435.62                | Bu  | 74.9   | 604.50                | Ag  | 89.8   | 724.82                | Au | 119.9 | 967.44  |
| Bu  | 8.1    | 64.97                 | Au  | 58.1   | 468.74                | Bg  | 75.0   | 604.99                | Au  | 89.9   | 724.98                | Ag | 120.0 | 967.71  |
| Au  | 8.3    | 66.67                 | Bu  | 58.2   | 469.36                | Ag  | 75.1   | 605.54                | Bg  | 89.9   | 725.53                | Bu | 121.9 | 983.61  |
| Ag  | 8.4    | 67.65                 | Bu  | 58.4   | 471.10                | Bu  | 75.1   | 605.81                | Bu  | 90.7   | 731.88                | Au | 121.9 | 983.71  |
| Bg  | 8.6    | 69.18                 | Ag  | 58.5   | 471.79                | Au  | 75.1   | 606.04                | Ag  | 90.7   | 732.12                | Ag | 122.0 | 984.40  |
| Au  | 9.2    | 74.50                 | Au  | 58.6   | 472.84                | Au  | 75.1   | 606.17                | Au  | 90.8   | 732.39                | Bg | 122.1 | 984.87  |
| Bu  | 9.6    | 77.07                 | Bg  | 58.6   | 473.10                | Bg  | 75.2   | 606.67                | Bg  | 90.8   | 732.77                | Bu | 226.8 | 1829.78 |
| Ag  | 10.1   | 81.13                 | Bg  | 59.1   | 476.78                | Ag  | 75.2   | 606.82                | Ag  | 91.7   | 740.03                | Au | 226.8 | 1829.99 |
| Bg  | 10.3   | 82.75                 | Ag  | 59.4   | 479.41                | Au  | 76.2   | 614.76                | Bg  | 91.7   | 740.11                | Bg | 227.7 | 1836.57 |
| Bu  | 10.3   | 83.36                 | Au  | 60.1   | 485.08                | Bu  | 76.4   | 616.75                | Bu  | 91.8   | 740.40                | Ag | 227.7 | 1836.91 |
| Ag  | 10.4   | 83.63                 | Bg  | 60.2   | 486.03                | Bg  | 76.5   | 616.87                | Au  | 91.8   | 740.44                | Bu | 228.0 | 1839.15 |
| Au  | 10.9   | 87.76                 | Bu  | 60.4   | 487.12                | Ag  | 76.8   | 619.59                | Bg  | 91.9   | 741.63                | Au | 228.0 | 1839.28 |
| Bg  | 11.5   | 92.86                 | Au  | 60.5   | 488.31                | Bu  | 78.1   | 629.96                | Bu  | 91.9   | 741.63                | Ag | 228.2 | 1840.84 |
| Au  | 12.0   | 96.67                 | Bu  | 60.7   | 490.06                | Bg  | 78.1   | 630.07                | Au  | 91.9   | 741.65                | Bg | 228.2 | 1840.97 |
| Bg  | 12.2   | 98.38                 | Ag  | 60.8   | 490.82                | Au  | 78.2   | 631.17                | Ag  | 92.0   | 741.90                | Bu | 229.1 | 1848.58 |
| Ag  | 12.2   | 98.67                 | Ag  | 61.0   | 492.52                | Ag  | 78.3   | 631.37                | Bg  | 94.2   | 759.68                | Au | 229.4 | 1850.99 |
| Bu  | 12.7   | 102.69                | Bg  | 61.5   | 496.47                | Bg  | 82.1   | 662.22                | Au  | 94.2   | 759.83                | Ag | 229.7 | 1853.36 |
| Ag  | 12.9   | 104.47                | Bu  | 63.9   | 515.90                | Ag  | 82.1   | 662.25                | Bu  | 94.2   | 760.13                | Bg | 229.8 | 1853.64 |
| Bg  | 14.0   | 113.04                | Au  | 64.3   | 518.81                | Bu  | 82.1   | 662.26                | Ag  | 94.6   | 762.81                | Bu | 231.5 | 1867.87 |
| Ag  | 14.4   | 116.23                | Au  | 64.8   | 522.66                | Au  | 82.1   | 662.31                | Bu  | 96.4   | 777.88                | Ag | 231.6 | 1868.69 |
| Bu  | 14.6   | 117.79                | Ag  | 64.8   | 523.17                | Bu  | 82.6   | 666.46                | Au  | 96.4   | 778.00                | Au | 232.0 | 1872.06 |
| Bu  | 14.9   | 120.52                | Bg  | 65.3   | 526.64                | Ag  | 82.7   | 667.28                | Bg  | 96.5   | 778.36                | Bg | 232.1 | 1872.10 |
| Bu  | 15.5   | 124.95                | Bu  | 65.4   | 527.33                | Au  | 82.7   | 667.36                | Ag  | 96.5   | 778.42                | Au | 232.2 | 1873.59 |
| Bg  | 15.5   | 125.35                | Bg  | 65.5   | 528.36                | Bg  | 82.7   | 667.55                | Bu  | 97.3   | 785.31                | Ag | 232.4 | 1874.54 |
| Ag  | 15.8   | 127.12                | Ag  | 65.5   | 528.45                | Bu  | 84.5   | 681.50                | Au  | 97.4   | 785.47                | Bu | 232.4 | 1874.87 |
| Bg  | 15.8   | 127.56                | Au  | 66.4   | 535.28                | Au  | 84.6   | 682.76                | Ag  | 97.4   | 785.82                | Bg | 232.5 | 1875.53 |
| Au  | 16.8   | 135.80                | Bu  | 66.4   | 535.67                | Bg  | 84.6   | 682.88                | Bg  | 97.4   | 786.12                | Bu | 233.0 | 1879.49 |
| Bu  | 17.3   | 139.36                | Au  | 66.4   | 535.73                | Ag  | 84.7   | 683.03                | Au  | 106.6  | 859.74                | Bg | 233.0 | 1879.66 |
| Bg  | 17.5   | 141.11                | Ag  | 66.6   | 537.45                | Au  | 85.3   | 687.81                | Bu  | 106.6  | 859.91                | Ag | 233.1 | 1880.49 |
| Au  | 17.5   | 141.52                | Bg  | 66.6   | 537.60                | Bu  | 85.3   | 688.39                | Ag  | 106.6  | 860.31                | Au | 233.1 | 1880.51 |
| Ag  | 17.8   | 143.52                | Bu  | 66.8   | 538.64                | Ag  | 85.4   | 688.71                | Bg  | 106.7  | 860.61                | Bu | 233.5 | 1883.77 |
| Au  | 18.4   | 148.76                | Bg  | 66.9   | 539.92                | Bg  | 85.4   | 688.83                | Bu  | 106.7  | 860.66                | Ag | 233.6 | 1884.29 |
| Bg  | 18.5   | 149.46                | Bu  | 67.2   | 541.81                | Au  | 86.6   | 698.82                | Au  | 106.7  | 860.71                | Bg | 233.7 | 1885.36 |
| Bg  | 19.7   | 158.77                | Ag  | 67.2   | 542.37                | Bu  | 86.7   | 699.25                | Ag  | 106.7  | 861.09                | Au | 233.8 | 1885.81 |
| Ag  | 20.5   | 165.16                | Bg  | 67.3   | 543.29                | Bg  | 86.8   | 699.90                | Bg  | 106.8  | 861.28                | Bu | 233.9 | 1887.35 |
| Bu  | 20.7   | 166.84                | Ag  | 67.5   | 544.53                | Ag  | 86.8   | 700.44                | Au  | 111.1  | 896.05                | Au | 234.0 | 1887.90 |
| Au  | 21.1   | 169.83                | Au  | 67.5   | 544.71                | Au  | 87.0   | 702.04                | Bg  | 111.1  | 896.18                | Bg | 234.9 | 1894.67 |
| Au  | 21.8   | 175.61                | Bu  | 68.8   | 554.74                | Bu  | 87.1   | 703.07                | Bu  | 111.1  | 896.38                | Ag | 234.9 | 1894.81 |
| Bg  | 22.6   | 182.05                | Bg  | 68.8   | 554.83                | Bg  | 87.3   | 704.55                | Ag  | 111.1  | 896.51                | Au | 235.1 | 1896.44 |
| Ag  | 22.7   | 183.42                | Ag  | 68.8   | 555.06                | Ag  | 87.3   | 704.59                | Bu  | 111.3  | 897.87                | Ag | 235.3 | 1898.52 |
| Bu  | 23.7   | 191.06                | Au  | 68.9   | 555.50                | Au  | 87.5   | 705.67                | Bg  | 111.3  | 897.91                | Bu | 235.4 | 1899.26 |
| Bu  | 51.8   | 417.53                | Au  | 69.8   | 562.81                | Bu  | 87.6   | 706.34                | Au  | 111.3  | 898.10                | Bg | 235.8 | 1902.18 |
| Au  | 52.1   | 420.72                | Bu  | 69.8   | 563.28                | Ag  | 87.6   | 706.81                | Ag  | 111.3  | 898.26                | Au | 236.6 | 1908.87 |
| Bg  | 52.7   | 425.46                | Ag  | 69.8   | 563.44                | Bg  | 87.7   | 707.76                | Au  | 112.6  | 908.76                | Bu | 236.6 | 1909.06 |
| Ag  | 52.8   | 425.61                | Bg  | 69.9   | 563.68                | Au  | 88.0   | 709.55                | Ag  | 112.7  | 909.60                | Bg | 236.7 | 1909.80 |
| Au  | 53.2   | 428.82                | Au  | 71.1   | 573.56                | Ag  | 88.0   | 710.26                | Bu  | 112.8  | 909.97                | Ag | 236.9 | 1911.04 |
| Bu  | 53.4   | 430.70                | Ag  | 71.1   | 573.68                | Bg  | 88.1   | 710.69                | Bg  | 112.8  | 910.27                |    |       |         |
| Bg  | 53.5   | 431.24                | Bg  | 71.1   | 573.75                | Bu  | 88.1   | 710.81                | Bu  | 113.1  | 912.29                |    |       |         |
|     |        |                       | Bu  | 71.2   | 574.52                | Bu  | 88.6   | 715.14                | Au  | 113.2  | 913.09                |    |       |         |
